# Supplementary material for: Anti-methicillin-resistant Staphylococcus aureus and antibiofilm activity of new peptides produced by a Brevibacillus strain
Source: PeerJ. 2023 Oct 2;11:e16143. doi: 10.7717/peerj.16143 (PMC10552749; doi:10.7717/peerj.16143)
Supplement: Supplemental Information 5 — Inhibition zone from agar well diffusion assay (Table 3) and stability test (Table 6). Fluorescence intensity from cell-permeability assay (Fig. 5). Cell number from time-killing kinetics assay (Fig. 6). Absorbance from inhibition of biofilm formation (Fig. 7). Cell number from biofilm eradication (Fig. 8). Absorbance from hemolysis (Fig. 9). [file peerj-11-16143-s005.xlsx]

## Sheet: Table 3
Agar well diffusion assay
Sample	Inhibition zone (mm)
	S. aureus TISTR 517					MRSA isolate 142					MRSA isolate 1096					MRSA isolate2468
	N1	N2	N3	Avg	SD	N1	N2	N3	Avg	SD	N1	N2	N3	Avg	SD	N1	N2	N3	Avg	SD
1× MIC P2 (0.2 mg)	0	0	0	0	0	0	0	0	0	0	0	0	0	0	0	0	0	0	0	0
5× MIC P2 (1 mg)	9.1	10.1	10.2	9.8	0.608276	9.07	11.6	10.9	10.5233	1.30638	11.2	11	11.3	11.1667	0.152753	11.3	11.6	11.3	11.4	0.173205
10× MIC P2 (2 mg)	12	13	12.2	12.4	0.52915	9.08	14.3	14.3	12.56	3.01377	14.6	15.2	14.8	14.8667	0.305505	15.5	14.2	14.3	14.6667	0.723418
20× MIC P2 (4 mg)	15.5	14.6	15	15.0333	0.450925	14.2	16.6	17.1	15.9667	1.55027	17.6	18.4	17.3	17.7667	0.568624	18.8	17.2	17.1	17.7	0.953939
40× MIC P2 (8 mg)	17.9	17.5	17.7	17.7	0.2	19.5	19.2	18.9	19.2	0.3	19.9	19.6	19.6	19.7	0.173205	21.6	20.2	19.1	20.3	1.253
Vancomycin (30 mg)	20.6	21	20.6	20.7333	0.23094	23.9	22.8	23.7	23.4667	0.585947	23	22.8	23.5	23.1	0.360555	23.8	23.9	24	23.9	0.1

## Sheet:  Table 6
Stabilility test
Temperature								Temperature
Sample	Inhibition zone (mm)							Sample	Residual activity (%)
	S. aureus TISTR 517			MRSA isolate2468					S. aureus TISTR 517			Avg	SD	MRSA isolate2468			Avg	SD
	N1	N2	N3	N1	N2	N3			N1	N2	N3			N1	N2	N3
Untreated	19.3	18.8	18.5	20.5	19.7	20		Untreated	100	100	100	100	0	100	100	100	100	0
25 °C	19.2	19	18.9	20	19.9	19.8		25 °C	99.4819	101.064	102.162	100.903	1.3474	97.561	101.015	99	99.1921	1.73512
50 °C	19.2	18.8	18.9	20	20.5	20.1		50 °C	99.4819	100	102.162	100.548	1.4217	97.561	104.061	100.5	100.707	3.25492
75 °C	19	18.6	18.1	20.1	19.9	20.2		75 °C	98.4456	98.9362	97.8378	98.4065	0.550207	98.0488	101.015	101	100.021	1.7083
100 °C	19	18.8	18.6	20.9	19	19.7		100 °C	98.4456	100	100.541	99.662	1.08759	101.951	96.4467	98.5	98.966	2.78169
Protease								Protease
Sample	Inhibition zone (mm)							Sample	Residual activity (%)
	S. aureus TISTR 517			MRSA isolate2468					S. aureus TISTR 517			Avg	SD	MRSA isolate2468			Avg	SD
	N1	N2	N3	N1	N2	N3			N1	N2	N3			N1	N2	N3
Untreated	20.4	20.5	20	20.9	22	21.8		Untreated	100	100	100	100	0	100	100	100	100	0
a-Chymotrpsin	20.3	20.2	19.5	20.9	21.2	21.3		a-Chymotrpsin	99.5098	98.5366	97.5	98.5155	1.00507	100	96.3636	97.7064	98.0234	1.83878
Trypsin	20.2	19	20.2	21.1	21.1	21.8		Trypsin	99.0196	92.6829	101	97.5675	4.34452	100.957	95.9091	100	98.9553	2.68117
Proteinase K	20	19.9	19.5	21	22.4	21.6		Proteinase K	98.0392	97.0732	97.5	97.5375	0.484111	100.478	101.818	99.0826	100.46	1.3679
pH								pH
Sample	Inhibition zone (mm)							Sample	Residual activity (%)
	S. aureus TISTR 517			MRSA isolate2468					S. aureus TISTR 517			Avg	SD	MRSA isolate2468			Avg	SD
	N1	N2	N3	N1	N2	N3			N1	N2	N3			N1	N2	N3
Untreated	18.1	18	18.1	18.3	18.1	18.7		Untreated	100	100	100	100	0	100	100	100	100	0
3	16.5	16.9	16.8	18	17.8	18.3		3	91.1602	93.8889	92.8177	92.6223	1.37479	98.3607	98.3425	97.861	98.1881	0.283414
4	16.5	16.9	16.6	17.5	18.1	17.8		4	91.1602	93.8889	91.7127	92.2539	1.4426	95.6284	100	95.1872	96.9385	2.66048
5	17.9	17.2	17.9	18.9	17.3	17.2		5	98.895	95.5556	98.895	97.7819	1.92805	103.279	95.5801	91.9786	96.9458	5.7725
6	18.1	18.2	18.6	18.3	17.9	18.4		6	100	101.111	102.762	101.291	1.38999	100	98.895	98.3957	99.0969	0.820973
7	17.6	17.7	18.8	18.3	19	18.6		7	97.2376	98.3333	103.867	99.8128	3.5539	100	104.972	99.4652	101.479	3.03697
8	17	17.2	17.7	18.6	18.5	19		8	93.9227	95.5556	97.7901	95.7561	1.94148	101.639	102.21	101.604	101.818	0.340011
9	18	17.3	17.3	18.7	18.6	18.5		9	99.4475	96.1111	95.5801	97.0462	2.09644	102.186	102.762	98.9305	101.293	2.06613
10	17	17.9	16.4	18.5	17.9	18.6		10	93.9227	99.4444	90.6077	94.6583	4.46405	101.093	98.895	99.4652	99.8177	1.14054

## Sheet: Fig 5
Cell-permeability assay
S. aureus TISTR 517																																S. aureus TISTR 517												S. aureus TISTR 517
Time (min)	64x MIC P2			32x MIC P2			16x MIC P2			8x MIC P2			4x MIC P2			2x MIC P2			1x MIC P2			1% Triton X-100			Dye + 64x MIC P2			Non-treatment				Mean												SD
	N1	N2	N3	N1	N2	N3	N1	N2	N3	N1	N2	N3	N1	N2	N3	N1	N2	N3	N1	N2	N3	N1	N2	N3	N1	N2	N3	N1	N2	N3		Time (min)	64x MIC P2	32x MIC P2	16x MIC P2	8x MIC P2	4x MIC P2	2x MIC P2	1x MIC P2	1% Triton X-100	Dye + 64x MIC P2	Non-treatment		Time (min)	64x MIC P2	32x MIC P2	16x MIC P2	8x MIC P2	4x MIC P2
-5	2958	3020	2576	2372	2656	2532	2584	2962	2378	2942	3192	2508	2846	3298	2378	3118	3024	2536	2374	2550	3526	3080	2648	3104	3136	3068	4004	2536	2568	2510		-5	2851.33	2520	2641.33	2880.67	2840.67	2892.67	2816.67	2944	3402.67	2538		-5	240.452	142.38	296.191	346.1	460.023
-4	2992	3224	2590	2292	2692	2516	2378	2928	2552	3198	3118	2576	3076	3300	2538	3130	3086	2662	2176	2474	3388	3098	2770	3086	3124	3180	3034	2582	2760	2574		-4	2935.33	2500	2619.33	2964	2971.33	2959.33	2679.33	2984.67	3112.67	2638.67		-4	320.776	200.479	281.114	338.39	391.634
-3	2881	3341	2793	2357	2733	2509	2277	2937	2505	3113	3153	2595	3057	3249	2593	3035	3183	2631	2251	2625	3495	3067	2653	3273	2961	3107	2983	2669	2947	2615		-3	3005	2533	2573	2953.67	2966.33	2949.67	2790.33	2997.67	3017	2743.67		-3	294.292	189.145	335.213	311.258	337.267
-2	3002	3132	2698	2340	2772	2504	2516	2854	2578	3192	3242	2636	3164	3286	2486	3018	3264	2740	2392	2528	3450	3094	2836	3360	3126	2998	2904	2602	2910	2590		-2	2944	2538.67	2649.33	3023.33	2978.67	3007.33	2790	3096.67	3009.33	2700.67		-2	222.738	218.076	179.937	336.371	431
-1	3043	3243	2723	2639	2713	2625	2605	3055	2559	3171	3251	2609	3079	3379	2517	2999	3329	2781	2405	2681	3319	3243	2909	3337	3183	2903	3169	2705	2805	2605		-1	3003	2659	2739.67	3010.33	2991.67	3036.33	2801.67	3163	3085	2705		-1	262.298	47.2864	274.054	349.859	437.586
0	6235	6465	6149	6469	6645	6663	6597	6389	6687	5035	5191	4671	3415	3665	2835	2631	3219	4033	2533	2793	3601	3779	3695	3533	2903	3069	3057	2756	2741	2813		0	6283	6592.33	6557.67	4965.67	3305	3294.33	2975.67	3669	3009.67	2770		0	163.377	107.188	152.844	266.843	425.793
0.5	7699	7629	7511	7029	7455	7367	7675	7417	7615	6239	6371	6033	3801	3889	3151	2179	3228	3807	2617	2763	3635	3791	3721	3543	2969	3005	2991	2705	2731	2712		0.5	7613	7283.67	7569	6214.33	3613.67	3071.33	3005	3685	2988.33	2716		0.5	95.0158	224.894	135.011	170.345	403.09
1	8431	8435	8239	7831	8371	8179	8147	8015	8433	7173	7455	7035	4095	4113	3377	2474	2818	3406	2709	2621	3687	4053	3911	3781	3093	3099	3247	2789	2880	2838		1	8368.33	8127	8198.33	7221	3861.67	2899.33	3005.67	3915	3146.33	2835.67		1	112.024	273.73	213.676	214.075	419.83
1.5	8970	9116	8980	8594	9038	9120	8934	8552	8894	7828	8080	7778	4648	4610	3580	2607	3143	3711	2646	2830	3554	4154	4058	3818	2994	3014	2900	2868	2888	2897		1.5	9022	8917.33	8793.33	7895.33	4279.33	3153.67	3010	4010	2969.33	2884.33		1.5	81.5598	283.001	209.956	161.868	605.938
2	9405	9659	9573	9285	9539	9459	9345	9017	9309	8233	8537	8199	4799	4957	3875	2831	3643	3343	2641	2661	3781	4175	4133	3991	2937	2991	3141	2952	3032	3022		2	9545.67	9427.67	9223.67	8323	4543.67	3272.33	3027.67	4099.67	3023	3002		2	129.187	129.867	179.881	186.107	584.446
2.5	10085	10231	9997	9619	10169	9813	9577	9555	9793	8785	9201	8743	5015	5023	4107	2896	2843	3652	2561	2733	3765	4419	4319	4235	2851	3167	2939	3067	3130	3048		2.5	10104.3	9867	9641.67	8909.67	4715	3130.33	3019.67	4324.33	2985.67	3081.67		2.5	118.192	278.948	131.519	253.175	526.559
3	10681	10597	10397	10381	10693	10427	10193	9911	10285	9279	9783	9169	5227	5307	4383	2719	3142	3618	2699	2889	3779	4383	4395	4217	2847	3121	3075	3055	3089	3140		3	10558.3	10500.3	10129.7	9410.33	4972.33	3159.67	3122.33	4331.67	3014.33	3094.67		3	145.895	168.432	194.878	327.392	511.943
3.5	10874	11152	10748	10486	10978	10610	10296	9914	10300	9258	9734	9346	5370	5192	4326	2986	3361	3990	2562	2818	3766	4394	4256	4158	3194	2940	3022	3084	3141	3151		3.5	10924.7	10691.3	10170	9446	4962.67	3445.67	3048.67	4269.33	3052	3125.33		3.5	206.711	255.885	221.712	253.267	558.506
4	11092	11190	11016	10574	11164	10792	10074	10068	10334	9726	10074	9504	5326	5404	4238	2866	3403	3917	2568	2720	3680	4514	4406	4220	2922	3046	3022	3160	3250	3115		4	11099.3	10843.3	10158.7	9768	4989.33	3395.33	2989.33	4380	2996.67	3175		4	87.2315	298.331	151.873	287.312	651.841
4.5	11575	11677	11557	11095	11529	11205	10665	10365	10719	10129	10277	9857	5551	5639	4577	3021	3525	4261	2649	2861	3605	4621	4623	4559	2925	2827	3083	3227	3250	3249		4.5	11603	11276.3	10583	10087.7	5255.67	3602.33	3038.33	4601	2945	3242		4.5	64.7148	225.622	190.714	213.029	589.387
5	11786	12110	11672	11312	11722	11602	10832	10652	10876	10128	10738	10012	5694	5614	4856	3073	3607	4039	2670	2898	3716	4620	4740	4372	2978	3082	2946	3187	3332	3265		5	11856	11545.3	10786.7	10292.7	5388	3573	3094.67	4577.33	3002	3261.33		5	227.236	210.792	118.682	390.007	462.459
10	12791	13083	12519	12079	12499	12117	11373	11141	11373	11233	11763	11023	6025	5961	5089	3091	3355	3115	2751	2917	3803	5073	4967	4639	3129	3013	3023	3371	3453	3385		10	12797.7	12231.7	11295.7	11339.7	5691.67	3187	3157	4893	3055	3403		10	282.059	232.296	133.945	381.357	522.905
15	13435	13633	13049	12529	12901	12691	11901	11617	11849	11739	12147	11563	6261	6371	5297	3717	4113	4244	2807	2805	3875	5387	5235	5061	2821	3009	3147	3416	3532	3451		15	13372.3	12707	11789	11816.3	5976.33	4024.67	3162.33	5227.67	2992.33	3466.33		15	297.001	186.515	151.208	299.582	590.885
30	14613	14025	14591	13779	14209	13369	12667	12273	12745	13033	12679	12715	7325	7309	5889	3122	3324	3612	3013	3207	4043	6567	6561	6371	3155	2825	3043	3664	3852	3662		30	14409.7	13785.7	12561.7	12809	6841	3352.67	3421	6499.67	3007.67	3726		30	333.313	420.04	253.016	194.823	824.495
60	14879	14791	14185	13873	14031	13945	13019	12489	12995	12841	13121	12519	7305	7117	5877	3102	3687	3889	2953	3235	4083	6973	7163	6733	3077	3153	3087	3498	3611	3458		60	14618.3	13949.7	12834.3	12827	6766.33	3559.33	3423.67	6956.33	3105.67	3522.33		60	377.848	79.1033	299.308	301.244	775.9
90	14721	14603	14193	14041	14285	13843	13201	12645	13201	12987	13437	12733	7541	7435	6229	2754	3336	3894	3181	3209	4521	7911	7993	7491	3129	3121	3171	2659	2839	2709		90	14505.7	14056.3	13015.7	13052.3	7068.33	3328	3637	7798.33	3140.33	2735.67		90	277.131	221.399	321.007	356.518	728.814
120	15907	14847	15715	15201	14909	15205	13881	13477	13189	13321	14235	14103	8899	9221	7365	2658	2784	3733	3455	3531	3349	10693	11181	10785	3015	3175	3019	2795	2935	2804		120	15489.7	15105	13515.7	13886.3	8495	3058.33	3445	10886.3	3069.67	2844.67		120	564.784	169.753	347.617	494.022	991.764
150	15133	14537	14935	14501	14313	14339	13725	12757	12881	13981	14301	13711	8537	9393	7889	2567	3104	3255	3477	3561	3427	13679	14583	14093	3141	3167	3155	2558	2581	2525		150	14868.3	14384.3	13121	13997.7	8606.33	2975.33	3488.33	14118.3	3154.33	2554.67		150	303.541	101.869	526.741	295.353	754.393
180	15413	15739	15225	14485	14341	14735	12915	12111	12513	14381	15083	13777	9573	10419	8701	2255	2581	3227	3741	3483	3651	17353	18979	18095	3081	3077	3045	2346	2379	2319		180	15459	14520.3	12513	14413.7	9564.33	2687.67	3625	18142.3	3067.67	2348		180	260.069	199.362	402	653.613	859.033
210	15185	14739	15231	13747	13725	14169	13209	12165	12687	14799	15207	14017	9995	10849	9113	2487	1941	2889	3467	3003	4143	20991	22791	21763	3095	3033	3069	2163	2220	2093		210	15051.7	13880.3	12687	14674.3	9985.67	2439	3537.67	21848.3	3065.67	2158.67		210	271.752	250.235	522	604.716	868.038
240	15096	15718	15598	13650	13290	13432	12732	11332	12142	14020	15202	14656	9936	10936	9492	2132	1843	3431	3396	3378	3518	24758	27982	26374	3184	2928	3026	2082	2250	2088		240	15470.7	13457.3	12068.7	14626	10121.3	2468.67	3430.67	26371.3	3046	2140		240	329.972	181.332	702.875	591.571	739.625
480	14265	14315	14917	12859	12675	13147	12283	11051	12217	14483	15473	14729	9773	10747	9293	2423	876	3195	2843	3083	4359	30249	33005	31347	3019	3167	3009	2130	2297	2141		480	14499	12893.7	11850.3	14895	9937.67	2164.67	3428.33	31533.7	3065	2189.33		480	362.861	237.902	693.029	515.453	740.854
720	14538	14162	15848	12812	12166	12734	12870	10802	11826	14900	16178	14700	10338	11698	10300	2446	1694	2913	3678	3780	3132	28614	34460	34522	3012	2808	2836	2220	2451	2224		720	14849.3	12570.7	11832.7	15259.3	10778.7	2351	3530	32532	2885.33	2298.33		720	885.068	352.615	1034.02	801.849	796.393
960	14398	13962	14974	12544	11952	12700	12468	10520	11964	14530	16052	14720	10082	11424	9866	2679	2121	3759	3288	3834	3172	36502	43090	42714	2896	2904	3034	2317	2552	2263		960	14444.7	12398.7	11650.7	15100.7	10457.3	2853	3431.33	40768.7	2944.67	2377.33		960	507.611	394.61	1011.09	829.338	844.096
1200	14655	14283	15165	12205	11757	12453	12249	10299	11961	14315	15879	14841	10345	11247	9699	4494	2792	6623	3471	3693	3081	39325	44693	43637	3081	2837	2953	2374	2681	2346		1200	14701	12138.3	11503	15011.7	10430.3	4636.33	3415	42551.7	2957	2467		1200	442.796	352.757	1052.59	795.845	777.52
1440	14945	13995	15689	12271	11627	12353	12325	10219	11861	13823	15099	14573	9951	11257	9679	3865	3513	7365	3407	3871	3237	36963	45991	43421	2971	2883	2427	2502	2820	2431		1440	14876.3	12083.7	11468.3	14498.3	10295.7	4914.33	3505	42125	2760.33	2584.33		1440	849.085	397.604	1106.55	641.269	843.574
MRSA isolate 2468																																MRSA isolate 2468												MRSA isolate 2468
Time (min)	64x MIC			32x MIC			16x MIC			8x MIC			4x MIC			2x MIC			1x MIC			1% Triton X-100			Dye + 64x MIC peptide			Non-treatment				Mean												SD
	N1	N2	N3	N1	N2	N3	N1	N2	N3	N1	N2	N3	N1	N2	N3	N1	N2	N3	N1	N2	N3	N1	N2	N3	N1	N2	N3	N1	N2	N3		Time (min)	64x MIC P2	32x MIC P2	16x MIC P2	8x MIC P2	4x MIC P2	2x MIC P2	1x MIC P2	1% Triton X-100	Dye + 64x MIC P2	Non-treatment		Time (min)	64x MIC	32x MIC	16x MIC	8x MIC	4x MIC
-5	3077	2863	2964	3275	3107	2624	2960	2909	2817	3010	2985	3228	2250	2733	2808	2678	3253	3343	3010	2985	3228	3262	3220	3199	2991	2993	3089	3262	2972	3039		-5	2968	3002	2895.33	3074.33	2597	3091.33	3074.33	3227	3024.33	3091		-5	107.056	337.963	72.473	133.665	302.842
-4	2696	2680	2579	2789	2894	2936	2877	2864	2583	2831	2936	3129	2348	2465	3024	2795	2935	3600	2831	2936	3129	3158	3578	2751	2966	3176	2876	3137	3146	3196		-4	2651.67	2873	2774.67	2965.33	2612.33	3110	2965.33	3162.33	3006	3159.67		-4	63.4376	75.7166	166.115	151.15	361.282
-3	2927	3011	2717	2999	3020	3188	2894	3007	2617	2604	3003	2986	2474	2726	2940	2945	3245	3500	2604	3003	2986	2999	3137	3259	2884	2832	2928	3389	3352	3074		-3	2885	3069	2839.33	2864.33	2713.33	3230	2864.33	3131.67	2881.33	3271.67		-3	151.433	103.591	200.665	225.615	233.258
-2	2492	2710	2979	3109	2895	3000	2786	2689	2828	2916	3114	3198	2446	2635	2454	2412	3137	2922	2916	3114	3198	3550	3223	3206	2873	2999	2905	3198	3282	3206		-2	2727	3001.33	2767.67	3076	2511.67	2823.67	3076	3326.33	2925.67	3228.67		-2	243.945	107.006	71.2905	144.79	106.885
-1	2586	2682	2804	2897	2901	2863	3031	3325	3342	2481	3140	2926	2670	2229	2834	2583	2653	3373	2481	3140	2926	2876	2951	2771	2855	3031	3051	2825	2930	2493		-1	2690.67	2887	3232.67	2849	2577.67	2869.67	2849	2866	2979	2749.33		-1	109.258	20.8806	174.855	336.18	312.89
0	7863.8	8031.8	7926.8	5967.5	5988.5	5686.1	8365.7	8262.8	8661.8	8321.6	8575.7	8764.7	3982	4112	4292	2443	2989	3745	2363	2871	3249	2325	2397	2178	2997	3013	3071	3287	2964	3073		0	7940.8	5880.7	8430.1	8554	4128.67	3059	2827.67	2300	3027	3108		0	84.8705	168.855	207.149	222.346	155.671
0.5	9884	9902.9	9881.9	7798.7	7790.3	7998.2	9537.5	9541.7	9615.2	9088.1	9281.3	9443	4182	4414	4542	2023	2997	3535	2636	3023	3346	2351	2401	2640	2871	2877	3097	3073	2817	2905		0.5	9889.6	7862.4	9564.8	9270.8	4379.33	2851.67	3001.67	2464	2948.33	2931.67		0.5	11.5659	117.681	43.6982	177.683	182.487
1	11207.7	10951.5	10779.3	9248.4	9202.2	9051	10168.2	10147.2	10682.7	9590.7	9597	9935.1	4468	4547	4682	2386	2717	3284	2801	2814	3490	2394	2898	2512	2822	2808	2840	3373	3091	2839		1	10979.5	9167.2	10332.7	9707.6	4565.67	2795.67	3035	2601.33	2823.33	3101		1	215.568	103.249	303.291	197.046	108.214
1.5	12168.8	11923.1	11700.5	10381.7	10270.4	9888.2	10814.3	10997	11089.4	9692.9	10022.6	10123.4	4552	4686	4828	2607	3143	3711	3006	3665	3867	2582	2393	2359	3179	3099	3135	3069	3283	2850		1.5	11930.8	10180.1	10966.9	9946.3	4688.67	3153.67	3512.67	2444.67	3137.67	3067.33		1.5	234.245	258.846	139.998	225.164	138.019
2	12962.6	12674.9	12406.1	11169.2	10946.6	10776.5	11425.4	11419.1	11360.3	10052	10537.1	10591.7	4608	4811	4736	2831	3643	3343	3304	3014	3123	2561	2829	2300	3041	3167	3159	3329	2934	3060		2	12681.2	10964.1	11401.6	10393.6	4718.33	3272.33	3147	2563.33	3122.33	3107.67		2	278.303	196.934	35.9053	297.091	102.647
2.5	13285.3	12928.3	12924.1	11823.7	11737.6	11357.5	11924.5	11645.2	11809	10200.4	10288.6	10500.7	4727	4712	4943	2896	2843	3652	3181	3357	2941	2337	2895	2601	3151	3073	3159	2811	2883	3000		2.5	13045.9	11639.6	11792.9	10329.9	4794	3130.33	3159.67	2611	3127.67	2898		2.5	207.337	248.07	140.344	154.351	129.256
3	14035.7	13819.4	13737.5	12349.4	12084.8	11986.1	12307.4	12049.1	12349.4	10511.9	10640	11165	4705	4830	4971	2816	3254	3747	2964	3220	3010	2225	2871	2716	3105	3111	3069	3258	3170	2976		3	13864.2	12140.1	12235.3	10772.3	4835.33	3272.33	3064.67	2604	3095	3134.67		3	154.065	187.857	162.616	346.067	133.08
3.5	14098.7	14258.3	13880.3	12645.5	12557.3	12227.6	12446	12351.5	12500.6	10629.5	10711.4	11114.6	4784	4895	5081	3093	3481	4132	3199	2943	3329	2712	2888	2611	3011	3057	3039	3081	3254	3136		3.5	14079.1	12476.8	12432.7	10818.5	4920	3568.67	3157	2737	3035.67	3157		3.5	189.761	220.273	75.4345	259.679	150.07
4	14582.4	14361.9	14254.8	12996.9	12688.2	12589.5	12847.8	12545.4	12705	10747.8	10756.2	11159.4	4748	4907	5059	2968	3525	4057	3016	3032	3419	2289	2633	2663	3196	3176	3192	3137	2940	2898		4	14399.7	12758.2	12699.4	10887.8	4904.67	3516.67	3155.67	2528.33	3188	2991.67		4	167.039	212.529	151.278	235.25	155.513
4.5	14769.3	14490	14403.9	13425.3	12864.6	12747	13114.5	12950.7	13049.4	10890.6	11140.5	11220.3	4794	4943	5161	3129	3651	4414	2987	3059	3203	2654	3003	2125	3146	3020	3034	2936	3007	3209		4.5	14554.4	13012.3	13038.2	11083.8	4966	3731.33	3083	2594	3066.67	3050.67		4.5	191.023	362.47	82.4724	172.008	184.578
5	15242.5	14833	14849.8	13594	13499.5	12882.1	13113.1	13234.9	13270.6	11179	11130.7	11626.3	4909	5067	5195	3183	3736	4184	2749	3041	3178	2874	2912	2614	3141	3061	3153	2950	2820	2950		5	14975.1	13325.2	13206.2	11312	5057	3701	2989.33	2800	3118.33	2906.67		5	231.727	386.634	82.5792	273.261	143.262
10	16007.6	15585.5	15396.5	14191.1	13771.1	13596.8	13882.4	13519.1	13878.2	11654.3	11677.4	11933.6	5215	5193	5322	3201	3474	3226	3229	3271	3354	2603	2985	2691	3123	3029	3111	3279	3308	3006		10	15663.2	13853	13759.9	11755.1	5243.33	3300.33	3284.67	2759.67	3087.67	3197.67		10	312.872	305.498	208.549	155.016	69.0097
15	16312.8	16161.6	16176.3	14855.4	14550.9	14399.7	14227.5	14023.8	14189.7	12140.1	11959.5	12444.6	5300	5417	5456	3850	4260	4396	3348	3401	3139	2814	2810	2705	3014	3010	3148	3247	2902	2948		15	16216.9	14602	14147	12181.4	5391	4168.67	3296	2776.33	3057.33	3032.33		15	83.3764	232.108	108.355	245.173	81.185
30	17290	17023.3	16893.1	16019.5	15841	15372.7	15320.2	15471.4	15328.6	13262.2	12980.8	13287.4	5719	5785	5879	3568	3799	4128	3098	3729	3144	3525	3294	3105	3155	3123	3195	3433	2895	3143		30	17068.8	15744.4	15373.4	13176.8	5794.33	3831.67	3323.67	3308	3157.67	3157		30	202.324	334.045	84.9743	170.208	80.4073
60	20033.3	20039.6	20092.1	18851	18788	18305	17819.9	17624.6	17708.6	15728.3	15612.8	15955.1	5829	6023	6090	3600	4279	4514	3381	3172	3411	4056	3942	3951	3129	3115	3023	3321	3409	3191		60	20055	18648	17717.7	15765.4	5980.67	4131	3321.33	3983	3089	3307		60	32.2836	298.712	97.9675	174.14	135.552
90	22168.3	21880.6	22483.3	21987.7	22506.4	22573.6	20009.5	19772.2	18310.6	18186.7	18157.3	18764.2	7313	7506	7691	3197	3872	4520	3269	3216	3174	13593	14286	13437	3171	3159	3033	3319	3034	3135		90	22177.4	22355.9	19364.1	18369.4	7503.33	3863	3219.67	13772	3121	3162.67		90	301.453	320.636	920.04	342.223	189.014
120	23241.4	24396.4	23119.6	22873.9	24390.1	25211.2	21521.5	20855.8	20314	20066.2	19566.4	21179.2	7949	7994	8333	3323	3480	4667	3250	3106	3364	20913	21703	21077	3025	3167	3043	3130	2664	3042		120	23585.8	24158.4	20897.1	20270.6	8092	3823.33	3240	21231	3078.33	2945.33		120	704.637	1185.75	604.809	825.6	209.921
150	26757.5	25602.5	25524.8	24105.2	25770.5	27001.1	24082.1	23143.4	22232	22295	22238.3	24542	8817	9009	9063	3208	3880	4069	4243	4141	3749	32066	32452	31898	3121	3193	3189	3371	2741	2523		150	25961.6	25625.6	23152.5	23025.1	8963	3719	4044.33	32138.7	3167.67	2878.33		150	690.364	1453.38	925.084	1313.98	129.29
180	26581.1	26396.3	26406.8	25482.8	26642	27482	25214	25524.8	25911.2	23809.1	23269.4	25436.6	9128	9291	9614	2819	3227	4034	5083	4107	4228	36961	37284	37515	3147	3195	3127	2976	3275	3199		180	26461.4	26535.6	25550	24171.7	9344.33	3360	4472.67	37253.3	3156.33	3150		180	103.796	1003.84	349.282	1128.18	247.351
210	26993.4	26729.5	27137.6	27078.8	26358.5	26237.4	24434.2	24350.2	27006.7	23951.9	23202.2	25589.9	10443	10170	10644	3108	2426	3611	4455	4238	4379	40195	42472	40275	3193	3173	3065	3622	3681	3702		210	26953.5	26558.2	25263.7	24248	10419	3048.33	4357.33	40980.7	3143.67	3668.33		210	206.955	454.872	1510.07	1221.08	237.91
240	28623	27733.3	28175.7	28637	27391	26992	25843.3	25228	27328	23898.7	23109.1	27216.7	10235	10095	10866	2588	2238	4166	4865	4196	4789	43467	43472	41947	3157	3069	3177	3702	3655	3193		240	28177.3	27673.3	26133.1	24741.5	10398.7	2997.33	4616.67	42962	3134.33	3516.67		240	444.852	858.074	1079.58	2179.64	410.731
480	27542.2	29586.9	31054.1	20851.6	27271.3	37334.5	24889.9	27941.2	27403.6	24556	23245.6	25629.1	11677	10926	12052	2942	1064	3879	3901	5330	4323	45391	47440	44219	3103	3155	3027	3367	3548	3438		480	29394.4	28485.8	26744.9	24476.9	11551.7	2628.33	4518	45683.3	3095	3451		480	1763.85	8308.29	1628.81	1193.72	573.368
720	23815.4	29439.3	30009.2	24741.5	31364.9	25918.2	25769.1	25973.5	26495	25132.1	25346.3	26553.8	11688	11323	11915	2970	2058	3538	4184	4571	4476	48084	51272	47215	3012	3052	3054	3171	3016	3049		720	27754.6	27341.5	26079.2	25677.4	11642	2855.33	4410.33	48857	3039.33	3078.67		720	3423.36	3533.66	374.315	766.504	298.669
960	28670.6	27593.3	30613.1	27286.7	25327.4	26999.7	26550.3	28184.1	28555.8	26734.4	25178.3	26839.4	11801	11530	12326	3253	2575	4565	4043	4647	4233	52700	56135	51990	3034	3124	3120	3217	3410	3352		960	28959	26537.9	27763.4	26250.7	11885.7	3464.33	4307.67	53608.3	3092.67	3326.33		960	1530.42	1058.13	1066.89	930.208	404.698
1200	28495.4	28763.4	30970.6	26601.2	30488.4	26518.5	25699	25421.8	27534.9	24809.6	23697	30719	12683	11856	13717	5458	3390	8043	4849	4826	5282	53092	56691	51891	3054	3090	3076	3210	3411	3217		1200	29409.8	27869.4	26218.6	26408.5	12752	5630.33	4985.67	53891.3	3073.33	3279.33		1200	1358.32	2268.53	1148.37	3774.2	932.417
1440	28668.3	29240.8	28485.4	26757.3	29082.9	26310.9	26159.2	26829.9	28000.9	25084.6	26976.6	30935.6	12377	12206	14077	4693	4266	8943	5165	4481	4823	54626	56898	54412	3157	3065	3185	3181	3265	3044		1440	28798.2	27383.7	26996.7	27665.6	12886.7	5967.33	4823	55312	3135.67	3163.33		1440	394.089	1488.38	932.107	2985.73	1034.4
[truncated: 5 more columns]

## Sheet: Fig 6
Time-killing kinetics
S. aureus TISTR 517	Colony count													S. aureus TISTR 517	Log (Colony count)
	Non-treatment			1x MIC P2			5x MIC P2			10x MIC P2					Non-treatment					1x MIC P2					5x MIC P2					10x MIC P2
Time (h)	N1	N2	N3	N1	N2	N3	N1	N2	N3	N1	N2	N3		Time (h)	N1	N2	N3	Avg	SD	N1	N2	N3	Avg	SD	N1	N2	N3	Avg	SD	N1	N2	N3	Avg	SD
0	100000	90000	83000	85000	90000	88000	105000	80000	72000	85000	80000	79000		0	5	4.95424	4.91908	4.95777	0.0405763	4.92942	4.95424	4.94448	4.94271	0.0125059	5.02119	4.90309	4.85733	4.9272	0.0845481	4.92942	4.90309	4.89763	4.91005	0.0169989
1	89000	95000	78000	94000	80000	75000	74000	80000	65000	78000	81000	64000		1	4.94939	4.97772	4.89209	4.93974	0.0436232	4.97313	4.90309	4.87506	4.91709	0.0505107	4.86923	4.90309	4.81291	4.86175	0.0455521	4.89209	4.90849	4.80618	4.86892	0.0549489
2	82000	109000	103000	115000	112000	109000	60000	75000	71000	75000	64000	59000		2	4.91381	5.03743	5.01284	4.98803	0.0654349	5.0607	5.04922	5.03743	5.04911	0.011636	4.77815	4.87506	4.85126	4.83482	0.0505021	4.87506	4.80618	4.77085	4.81736	0.0529973
3	110000	118000	60000	112000	95000	119000	75000	62000	32000	32000	40000	25000		3	5.04139	5.07188	4.77815	4.96381	0.161505	5.04922	4.97772	5.07555	5.03416	0.0506196	4.87506	4.79239	4.50515	4.7242	0.194155	4.50515	4.60206	4.39794	4.50172	0.102103
6	250000	300000	353000	42000	23000	57000	5000	15000	21000	5000	6000	5000		6	5.39794	5.47712	5.54777	5.47428	0.0749578	4.62325	4.36173	4.75587	4.58028	0.200555	3.69897	4.17609	4.32222	4.06576	0.325944	3.69897	3.77815	3.69897	3.72536	0.0457153
12	2800000	2710000	3280000	39000	30000	47000	10	20	10	0	0	0		12	6.44716	6.43297	6.51587	6.46533	0.0443403	4.59106	4.47712	4.6721	4.58009	0.0979501	1	1.30103	1	1.10034	0.1738	0	0	0	0	0
18	28900000	27600000	34000000	27000	36000	16000	0	0	0	0	0	0		18	7.4609	7.44091	7.53148	7.47776	0.0475817	4.43136	4.5563	4.20412	4.39726	0.178551	0	0	0	0	0	0	0	0	0	0
24	35600000	44400000	38800000	17000	11000	24000	0	0	0	0	0	0		24	7.55145	7.64738	7.58883	7.59589	0.0483542	4.23045	4.04139	4.38021	4.21735	0.169789	0	0	0	0	0	0	0	0	0	0
MRSA 2468	Colony count													MRSA 2468	Log (Colony count)
	Non-treatment			1x MIC P2			5x MIC P2			10x MIC P2					Non-treatment					1x MIC P2					5x MIC P2					10x MIC P2
Time (h)	N1	N2	N3	N1	N2	N3	N1	N2	N3	N1	N2	N3		Time (h)	N1	N2	N3	Avg	SD	N1	N2	N3	Avg	SD	N1	N2	N3	Avg	SD	N1	N2	N3	Avg	SD
0	120000	80000	90000	100000	70000	80000	120000	110000	80000	100000	100000	80000		0	5.07918	4.90309	4.95424	4.97884	0.0905855	5	4.8451	4.90309	4.91606	0.0782616	5.07918	5.04139	4.90309	5.00789	0.0927036	5	5	4.90309	4.9677	0.055951
1	80000	120000	200000	120000	100000	150000	60000	200000	140000	60000	50000	90000		1	4.90309	5.07918	5.30103	5.09443	0.199408	5.07918	5	5.17609	5.08509	0.0881942	4.77815	5.30103	5.14613	5.0751	0.268578	4.77815	4.69897	4.95424	4.81045	0.130666
2	420000	240000	280000	140000	120000	180000	140000	80000	70000	70000	120000	40000		2	5.62325	5.38021	5.44716	5.48354	0.125537	5.14613	5.07918	5.25527	5.16019	0.0888843	5.14613	4.90309	4.8451	4.96477	0.159713	4.8451	5.07918	4.60206	4.84211	0.238575
3	330000	420000	250000	210000	250000	200000	70000	90000	80000	20000	48000	54000		3	5.51851	5.62325	5.39794	5.51323	0.112747	5.32222	5.39794	5.30103	5.3404	0.050948	4.8451	4.95424	4.90309	4.90081	0.0546079	4.30103	4.68124	4.73239	4.57155	0.235673
6	960000	810000	790000	130000	170000	160000	25000	50000	39000	3200	5300	6000		6	5.98227	5.90849	5.89763	5.92946	0.046056	5.11394	5.23045	5.20412	5.18284	0.0610991	4.39794	4.69897	4.59106	4.56266	0.152512	3.50515	3.72428	3.77815	3.66919	0.144596
12	3240000	3360000	2960000	260000	360000	425000	280	100	150	0	0	0		12	6.51055	6.52634	6.47129	6.50273	0.0283446	5.41497	5.5563	5.62839	5.53322	0.108564	2.44716	2	2.17609	2.20775	0.225254	0	0	0	0	0
18	43000000	52800000	39800000	32000	31600	32600	0	0	0	0	0	0		18	7.63347	7.72263	7.59988	7.652	0.0634379	4.50515	4.49969	4.51322	4.50602	0.00680692	0	0	0	0	0	0	0	0	0	0
24	80000000	58800000	44800000	14000	10800	23600	0	0	0	0	0	0		24	7.90309	7.76938	7.65128	7.77458	0.125987	4.14613	4.03342	4.37291	4.18415	0.172909	0	0	0	0	0	0	0	0	0	0

## Sheet: Fig 7
Inhibition of biofilm formation
S. aureus TISTR 517		Sample concentration (µg/mL)												S. aureus TISTR 517		Sample concentration (µg/mL)												S. aureus TISTR 517		Sample concentration (µg/mL)
Absorbance		0	0.5	1	2	4	8	16	32	64	128	256		Corrected Absorbance		0	0.5	1	2	4	8	16	32	64	128	256		Biofilm (%)		0	0.5	1	2	4	8	16	32	64	128	256
P2	N1	0.1491	0.1487	0.1472	0.1403	0.123	0.1191	0.1168	0.1181	0.1173	0.115	0.11		P2	N1	0.0404182	0.0400182	0.0385182	0.0316182	0.0143182	0.0104182	0.00811818	0.00941818	0.00861818	0.00631818	0.00131818		P2	N1	100	99.0103	95.2991	78.2276	35.4251	25.776	20.0855	23.3018	21.3225	15.632	3.26136
	N2	0.1486	0.1478	0.1488	0.1397	0.1276	0.1148	0.1179	0.1208	0.1148	0.1148	0.115			N2	0.0399182	0.0391182	0.0401182	0.0310182	0.0189182	0.00611818	0.00921818	0.0121182	0.00611818	0.00611818	0.00631818			N2	100	97.9959	100.501	77.7044	47.3924	15.3268	23.0927	30.3575	15.3268	15.3268	15.8278
	N3	0.1586	0.1503	0.1529	0.1399	0.1305	0.1167	0.1172	0.1151	0.1189	0.1149	0.1114			N3	0.0499182	0.0416182	0.0442182	0.0312182	0.0218182	0.00801818	0.00851818	0.00641818	0.0102182	0.00621818	0.00271818			N3	100	83.3728	88.5813	62.5387	43.7079	16.0626	17.0643	12.8574	20.4699	12.4567	5.44527
Van	N1	0.1622	0.1614	0.1613	0.1492	0.1468	0.1209	0.1194	0.114	0.1157	0.1198	0.1172		Van	N1	0.0535182	0.0527182	0.0526182	0.0405182	0.0381182	0.0122182	0.0107182	0.00531818	0.00701818	0.0111182	0.00851818			Avg	100	93.4597	94.7938	72.8236	42.1751	19.0551	20.0808	22.1723	19.0397	14.4719	8.17815
	N2	0.1601	0.1593	0.1578	0.1456	0.1486	0.1188	0.1195	0.1191	0.11293	0.1179	0.1143			N2	0.0514182	0.0506182	0.0491182	0.0369182	0.0399182	0.0101182	0.0108182	0.0104182	0.00424818	0.00921818	0.00561818			SD	0	8.75021	5.9759	8.9108	6.12911	5.83203	3.0142	8.80459	3.24363	1.7518	6.7142
	N3	0.1609	0.1582	0.1585	0.1488	0.1441	0.126	0.1206	0.1191	0.1202	0.1138	0.1156			N3	0.0522182	0.0495182	0.0498182	0.0401182	0.0354182	0.0173182	0.0119182	0.0104182	0.0115182	0.00511818	0.00691818		Van	N1	100	98.5052	98.3183	75.7092	71.2247	22.83	20.0272	9.93715	13.1136	20.7746	15.9164
Absorbance		N1	N2	N3	N4	N5	N6	N7	N8	N9	N10	N11																	N2	100	98.4441	95.5269	71.7999	77.6344	19.6782	21.0396	20.2617	8.26202	17.9279	10.9264
Blank		0.1192	0.1082	0.1021	0.1071	0.1081	0.1048	0.1063	0.111	0.1072	0.1114	0.1101																	N3	100	94.8294	95.4039	76.828	67.8273	33.165	22.8238	19.9513	22.0578	9.80153	13.2486
Avg Blank		0.108682																											Avg	100	97.2596	96.4164	74.779	72.2288	25.2244	21.2969	16.7167	14.4778	16.168	13.3638
																													SD	0	2.10482	1.64829	2.63997	4.98004	7.05504	1.41596	5.87331	6.99833	5.69428	2.49698
MRSA isolate2468		Sample concentration (µg/mL)												MRSA isolate2468		Sample concentration (µg/mL)
Absorbance		0	0.5	1	2	4	8	16	32	64	128	256		Corrected Absorbance		0	0.5	1	2	4	8	16	32	64	128	256
P2	N1	0.1625	0.1662	0.1643	0.1589	0.1441	0.1257	0.1115	0.1113	0.1131	0.109	0.106		P2	N1	0.06151	0.06521	0.06331	0.05791	0.04311	0.02471	0.01051	0.01031	0.01211	0.00801	0.00501
	N2	0.1659	0.1618	0.1677	0.1555	0.1419	0.1243	0.1122	0.1117	0.1094	0.1092	0.1018			N2	0.06491	0.06081	0.06671	0.05451	0.04091	0.02331	0.01121	0.01071	0.00841	0.00821	0.00081		MRSA isolate2468	Sample concentration (µg/mL)
	N3	0.1681	0.164	0.163	0.1573	0.1417	0.1213	0.1127	0.1111	0.1098	0.1114	0.1055			N3	0.06711	0.06301	0.06201	0.05631	0.04071	0.02031	0.01171	0.01011	0.00881	0.01041	0.00451		Absorbance		0	0.5	1	2	4	8	16	32	64	128	256
Van	N1	0.1641	0.1605	0.1592	0.1573	0.1454	0.128	0.1159	0.1121	0.1094	0.1085	0.1072		Van	N1	0.06311	0.05951	0.05821	0.05631	0.04441	0.02701	0.01491	0.01111	0.00841	0.00751	0.00621		P2	N1	100	106.015	102.926	94.1473	70.0862	40.1723	17.0867	16.7615	19.6879	13.0223	8.14502
	N2	0.1606	0.1598	0.1541	0.1555	0.1433	0.1289	0.1157	0.1122	0.114	0.1077	0.1048			N2	0.05961	0.05881	0.05311	0.05451	0.04231	0.02791	0.01471	0.01121	0.01301	0.00671	0.00381			N2	100	93.6836	102.773	83.9778	63.0257	35.9113	17.2701	16.4998	12.9564	12.6483	1.24788
	N3	0.1611	0.1594	0.1601	0.1597	0.1391	0.1245	0.1187	0.1127	0.1104	0.1098	0.1054			N3	0.06011	0.05841	0.05911	0.05871	0.03811	0.02351	0.01771	0.01171	0.00941	0.00881	0.00441			N3	100	93.8906	92.4005	83.907	60.6616	30.2637	17.449	15.0648	13.1277	15.5118	6.72031
Absorbance		N1	N2	N3	N4	N5	N6	N7	N8	N9	N10	N11																	Avg	100	97.8632	99.3667	87.344	64.5912	35.4491	17.2686	16.1087	15.2573	13.7275	5.37107
Blank		0.0955	0.101	0.1016	0.1018	0.138	0.1013	0.1018	0.1019	0.1018	0.1018	0.1014																	SD	0	7.06071	6.03332	5.89189	4.90342	4.97043	0.181161	0.913448	3.83791	1.55659	3.64115
Avg Blank		0.10099																										Van	N1	100	94.2957	92.2358	89.2252	70.3692	42.7983	23.6254	17.6042	13.3259	11.8999	9.83996
																													N2	100	98.6579	89.0958	91.4444	70.978	46.821	24.6771	18.8056	21.8252	11.2565	6.39155
																													N3	100	97.1719	98.3364	97.6709	63.4004	39.1116	29.4627	19.481	15.6546	14.6565	7.33655
																													Avg	100	96.7085	93.2227	92.7802	68.2492	42.9103	25.9217	18.6302	16.9353	12.6043	7.85602
																													SD	0	2.21774	4.69868	4.37847	4.21019	3.85591	3.1113	0.95059	4.39196	1.80613	1.78193

## Sheet: Fig 8
Biofilm eradication
Treatment	Colony count	Sample concentration (µg/mL)
		0	0.5	1	2	4	8	16	32	64	128	256
P2-S.aureus TISTR 517	N1	4500	2500	1000	5000	1000	1200	300	500	100	0	0
	N2	6000	900	2200	700	1000	900	1000	700	100	0	0
	N3	8000	9000	4500	400	2300	1900	800	1000	500	0	0
P2-MRSA 2468	N1	13300	15500	12500	4000	5900	4800	1700	1000	500	0	0
	N2	20000	19700	12000	3000	4500	4300	700	300	100	0	0
	N3	25000	15000	3500	12300	4800	5700	3000	200	500	0	0
Vanco-S.aureus TISTR 517	N1	8000	6100	1000	3300	10100	6900	9000	8000	5200	0	0
	N2	5500	8400	2200	1800	900	3800	900	1600	1900	0	0
	N3	7900	1400	12000	9300	3000	3000	3200	3000	4500	0	0
Vanco-MRSA 2468	N1	8000	3500	2300	700	2700	500	1300	400	100	0	0
	N2	5500	2100	1900	800	500	2200	200	100	100	0	0
	N3	7900	5100	5000	8000	2200	2800	2600	1400	900	0	0
Treatment	Log (CFU/mL)	Sample concentration (µg/mL)
		0	0.5	1	2	4	8	16	32	64	128	256
P2-S.aureus TISTR 517	N1	3.65321	3.39794	3	3.69897	3	3.07918	2.47712	2.69897	2	0	0
	N2	3.77815	2.95424	3.34242	2.8451	3	2.95424	3	2.8451	2	0	0
	N3	3.90309	3.95424	3.65321	2.60206	3.36173	3.27875	2.90309	3	2.69897	0	0
	Avg	3.77815	3.43548	3.33188	3.04871	3.12058	3.10406	2.7934	2.84802	2.23299	0	0
	SD	0.124939	0.501056	0.326734	0.576104	0.208844	0.16368	0.278162	0.150536	0.403551	0	0
P2-MRSA 2468	N1	4.12385	4.19033	4.09691	3.60206	3.77085	3.68124	3.23045	3	2.69897	0	0
	N2	4.30103	4.29447	4.07918	3.47712	3.65321	3.63347	2.8451	2.47712	2	0	0
	N3	4.39794	4.17609	3.54407	4.08991	3.68124	3.75587	3.47712	2.30103	2.69897	0	0
	Avg	4.27427	4.2203	3.90672	3.72303	3.70177	3.69019	3.18422	2.59272	2.46598	0	0
	SD	0.138989	0.0646264	0.314191	0.323807	0.0614475	0.0616924	0.318537	0.36354	0.403551	0	0
Vanco-S.aureus TISTR 517	N1	3.90309	3.78533	3	3.51851	4.00432	3.83885	3.95424	3.90309	3.716	0	0
	N2	3.74036	3.92428	3.34242	3.25527	2.95424	3.57978	2.95424	3.20412	3.27875	0	0
	N3	3.89763	3.14613	4.07918	3.96848	3.47712	3.47712	3.50515	3.47712	3.65321	0	0
	Avg	3.84703	3.61858	3.47387	3.58076	3.47856	3.63192	3.47121	3.52811	3.54932	0	0
	SD	0.092414	0.415011	0.551468	0.360656	0.525041	0.186414	0.500863	0.352264	0.236414	0	0
Vanco-MRSA 2468	N1	3.90309	3.54407	3.36173	2.8451	3.43136	2.69897	3.11394	2.60206	2	0	0
	N2	3.74036	3.32222	3.27875	2.90309	2.69897	3.34242	2.30103	2	2	0	0
	N3	3.89763	3.70757	3.69897	3.90309	3.34242	3.44716	3.41497	3.14613	2.95424	0	0
	Avg	3.84703	3.52462	3.44648	3.21709	3.15759	3.16285	2.94332	2.58273	2.31808	0	0
	SD	0.092414	0.19341	0.22256	0.594798	0.399655	0.405131	0.57624	0.573308	0.550932	0	0

## Sheet: Fig 9
Hemolysis
Absorbance		Sample concentration (µg/mL)
		0	1	2	4	8	16	32	64	128	256	512
P2	N1	0.0536	0.0586	0.0584	0.0612	0.0595	0.0674	0.0736	0.0756	0.0856	0.1137	0.1707
	N2	0.0537	0.0603	0.0604	0.0605	0.061	0.0698	0.0791	0.0773	0.086	0.1159	0.1739
	N3	0.0546	0.0632	0.0617	0.0603	0.06	0.0713	0.0736	0.0739	0.0882	0.1171	0.188
1%Triton X-100	N1	0.2222
	N2	0.2258
	N3	0.2223
Absorbance		N1	N2	N3	N4	N5	N6	N7	N8	N9	N10	N11	N12
Blank		0.0623	0.058	0.0591	0.0598	0.061	0.058	0.0611	0.0588	0.0591	0.0581	0.0591	0.0575
Avg Blank		0.059325
Corrected Absorbance		Sample concentration (µg/mL)
		0	1	2	4	8	16	32	64	128	256	512
P2	N1	-0.005725	-0.000725	-0.000925	0.001875	0.000175	0.008075	0.014275	0.016275	0.026275	0.054375	0.111375
	N2	-0.005625	0.000975	0.001075	0.001175	0.001675	0.010475	0.019775	0.017975	0.026675	0.056575	0.114575
	N3	-0.004725	0.003875	0.002375	0.000975	0.000675	0.011975	0.014275	0.014575	0.028875	0.057775	0.128675
1%Triton X-100	N1	0.162875
	N2	0.166475
	N3	0.162975
	Avg	0.164108
%Hemolysis		Sample concentration (µg/mL)
		0	1	2	4	8	16	32	64	128	256	512
P2	N1	-3.48855	-0.441781	-0.563652	1.14254	0.106637	4.92053	8.69852	9.91723	16.0108	33.1336	67.8668
	N2	-3.42761	0.59412	0.655055	0.71599	1.02067	6.38298	12.05	10.9531	16.2545	34.4742	69.8167
	N3	-2.8792	2.36125	1.44721	0.59412	0.411314	7.29701	8.69852	8.88133	17.5951	35.2054	78.4086
	Avg	-3.26512	0.837861	0.512873	0.817549	0.512873	6.20017	9.81567	9.91723	16.6201	34.2711	72.0307
	SD	0.335606	1.41732	1.01295	0.287969	0.465401	1.19874	1.93496	1.0359	0.853095	1.05073	5.60881
